# Supplementary material
Source: Research Square preprint supplement (doi:10.21203/rs.3.rs-9205139/v1)
Supplement: Supplementary file 1 [file ab600f548a623334460995c2.docx]

**Supplementary Materials**

Temporal Imprecision of the Self in Early Psychosis: Abnormal Infraslow Phase Dynamics and Brain Complexity

**Methods**

*Participants*

The study included 31 patients and 31 age- and sex-matched healthy controls. All patients were recruited from the outpatient clinics of the Department of Psychiatry in National Taiwan University Hospital (NTUH) and met the diagnostic criteria for Ultra-High Risk (UHR, n = 14), First Episode Psychosis (FEP, n = 12), schizophreniform disorder (n = 3), or First Episode Schizophrenia (FES, n = 2). UHR patients exhibited subthreshold psychotic symptoms that matched the criteria for attenuated psychotic symptoms or brief limited intermittent psychotic symptoms [1]. Both UHR and FEP patients underwent interviews using a Thought/Perception Diagnostic Interview Schedule, which included 19 items from the Scale of Prodromal Symptoms [2], to comprehensively assess at-risk mental states. FES and schizophreniform disorder patients had experienced their first episode of full-blown psychosis within the past year, meeting the DSM-IV criteria for schizophrenia or schizophreniform disorder, respectively. FEP patients had their first psychotic episode lasting less than 4 weeks at the time of recruitment. Patients were either antipsychotic-naïve or had received antipsychotic treatment for less than 12 weeks before recruitment (drug naïve = 18 and antipsychotic-short-exposure = 13) at baseline fMRI scanning. After the baseline scan, all patients were treated with flexible-dose aripiprazole, and symptom changes were assessed using the Positive and Negative Syndrome Scale (PANSS) on days 14 and 28. Participants in the healthy controls (HC) were interviewed by trained research assistants using the Chinese version of the Diagnostic Interview for Genetic Studies (DIGS) to screen for psychiatric disorders [3]. All participants were confirmed to have no current or past psychiatric history.

*Clinical Assessments*

The five PANSS Marder factors show strong internal consistency and reliability in both acute/relapsed and chronic/stable patients [4].

**Supplementary Table S1**. Recalculation of the PANSS Scale According to the Marder Factors

| **Marder Factors** | **PANSS Factors** |
| --- | --- |
| Positive Symptom | Delusions (P1)  Hallucinatory Behavior (P3)  Grandiosity (P5)  Suspiciousness (P6)  Stereotyped Thinking (N7)  Somatic Concern (G1)  Unusual Thought Content (G9)  Lack of Judgment and Insight (G12) |
| Negative Symptom | Blunted Affect (N1)  Emotional Withdrawal (N2)  Poor Rapport (N3)  Passive Social Withdrawal (N4)  Lack of Spontaneity and Flow of Conversation (N6)  Motor Retardation (G7)  Active Social Avoidance (G16) |
| Disorganized Thought | Conceptual Disorganization (P2)  Difficulty in Abstract Thinking (N5)  Mannerisms and Posturing (G5)  Disorientation (G10)  Poor Attention (G11)  Disturbance of Volition (G13)  Preoccupation (G15) |
| Uncontrolled Hostility/Excitement | Excitement (P4)  Hostility (P7)  Uncooperativeness (G8) |
|  | Poor Impulse Control (G14) |
| Anxiety/Depression | Anxiety (G2)  Guilt Feelings (G3)  Tension (G4)  Depression (G6) |
|  |  |

*Regions of Interest (ROI) Selection Based on Three Layers of Self*

These ROIs have also been applied in studies investigating schizophrenia and depression [5, 6]. For each self, multiple spherical ROIs with a 4-mm radius were created, each centered at the reported MNI coordinates. The spheres corresponding to the same self were then combined into a single ROI using the MarsBar toolbox. Visual-related regions were excluded due to the small FOV.

**Supplementary Table S2**. Selection of Regions of Interest Based on Three Layers of Self. Regions of interest (ROIs) were selected from a meta-analysis that identifies brain regions related to interoceptive, exteroceptive, and mental self [7]

| Region | L/R | BA | MNI Coordinates | | |
| --- | --- | --- | --- | --- | --- |
|  |  |  | x | Y | z |
| **Interoceptrive self** |  |  |  |  |  |
| Insula | R | BA13 | 34 | 12 | 12 |
| Dorsal anterior cingulate cortex | L | BA24 | 0 | 4 | 48 |
| Thalamus | R |  | 12 | -14 | 4 |
| ParahippocampalGyrus | R |  | 30 | -4 | -24 |
| ParahippocampalGyrus | L |  | -20 | -4 | -20 |
| Insula | L | BA13 | -40 | -2 | 2 |
| Insula | L | BA13 | -36 | 24 | 4 |
| Inferiorparietal lobule | R | BA40 | 56 | -26 | 26 |
| Superiorfrontalgyrus | R | BA8 | 4 | 24 | 48 |
| Superiortemporalgyrus | L | BA22 | -56 | 6 | 6 |
| Postcentral gyrus | L | BA2 | -48 | -16 | 32 |
| **Exteroceptive self** |  |  |  |  |  |
| Inferior frontal gyrus | R | BA46 | 48 | 40 | 8 |
| Premotor cortex | R | BA9 | 50 | 8 | 26 |
| Insula | R | BA13 | 40 | 8 | 0 |
| Superior parietal lobule | R | BA7 | 26 | −72 | 44 |
| Postcentral gyrus | R | BA3 | 58 | -22 | 38 |
| Inferior parietal lobule | R | BA40 | 36 | -50 | 56 |
| Insula | L | BA13 | -36 | 18 | -4 |
| Inferior parietal lobule | L | BA40 | -46 | -34 | 40 |
| Superior parietal lobule | L | BA7 | −22 | -64 | 50 |
| Cingulate gyrus | R | BA32 | 4 | 8 | 38 |
| Medial prefrontal cortex | L | BA10 | -6 | 60 | 22 |
| **Mental self** |  |  |  |  |  |
| Anterior Cingulate cortex/medial prefrontal cortex | L | BA32/BA10 | -6 | 48 | 0 |
| Posterior cingulate cortex | L | BA31 | -4 | -54 | 28 |
| Insula | L | BA13 | -36 | 22 | -2 |
| Middle temporal gyrus | L | BA39 | -48 | -66 | 28 |
| Thalamus | L |  | -8 | 2 | 8 |
| Superior frontal gyrus | L | BA8 | -20 | 36 | 46 |
| Cingulate gyrus |  | BA24 | 0 | -18 | 40 |
| Inferior temporal gyrus | L | BA21 | -62 | -6 | -18 |
| Middle temporal gyrus | R | BA39 | 54 | -60 | 24 |
| Insula | R | BA13 | 52 | 10 | -6 |
| Superior frontal gyrus | L | BA10 | -24 | 50 | 22 |
| Premotor cortex | R | BA6 | 46 | 6 | 24 |

Abbreviations: BA, Brodmann area; L, Left; R, Right.

*fMRI data analysis*

*Control Analysis: Median Frequency and Frequency Power*

To account for the slow-fast frequency balance of the power spectrum, we measured median frequency (MF) that indicates a midpoint that divides the power spectral distribution into two equal areas, with 50% of the total power above and below the MF [8]. Previous studies have suggested that MF is less affected by random noise [8, 9], and has also been applied in fMRI research [8, 10–12]. The low MF value indicates that the signal's energy is concentrated in the lower frequency range, meaning low-frequency components dominate the signal. In contrast, a high MF reflects dominance by high-frequency components [8]. To compute the MF, we transformed the time-series resting fMRI data into the frequency domain using the Periodogram in MATLAB. The MF calculation script is available at http://www.georgnorthoff.com/code.

To distinguish between phase and amplitude components in our signal, we calculated frequency power (FP), which reflects dynamic changes in signal energy within a specific frequency band over time, independent of underlying phase cycle dynamics [13]. FP is estimated as the squared instantaneous amplitude of the band-pass filtered signal obtained via the Hilbert transform [13, 14]. Specifically, this involves extracting the modulus of the analytic signal, representing the instantaneous amplitude at each time point within the frequency band [14, 15].

*Shuffling to test the phase specificity of PF*


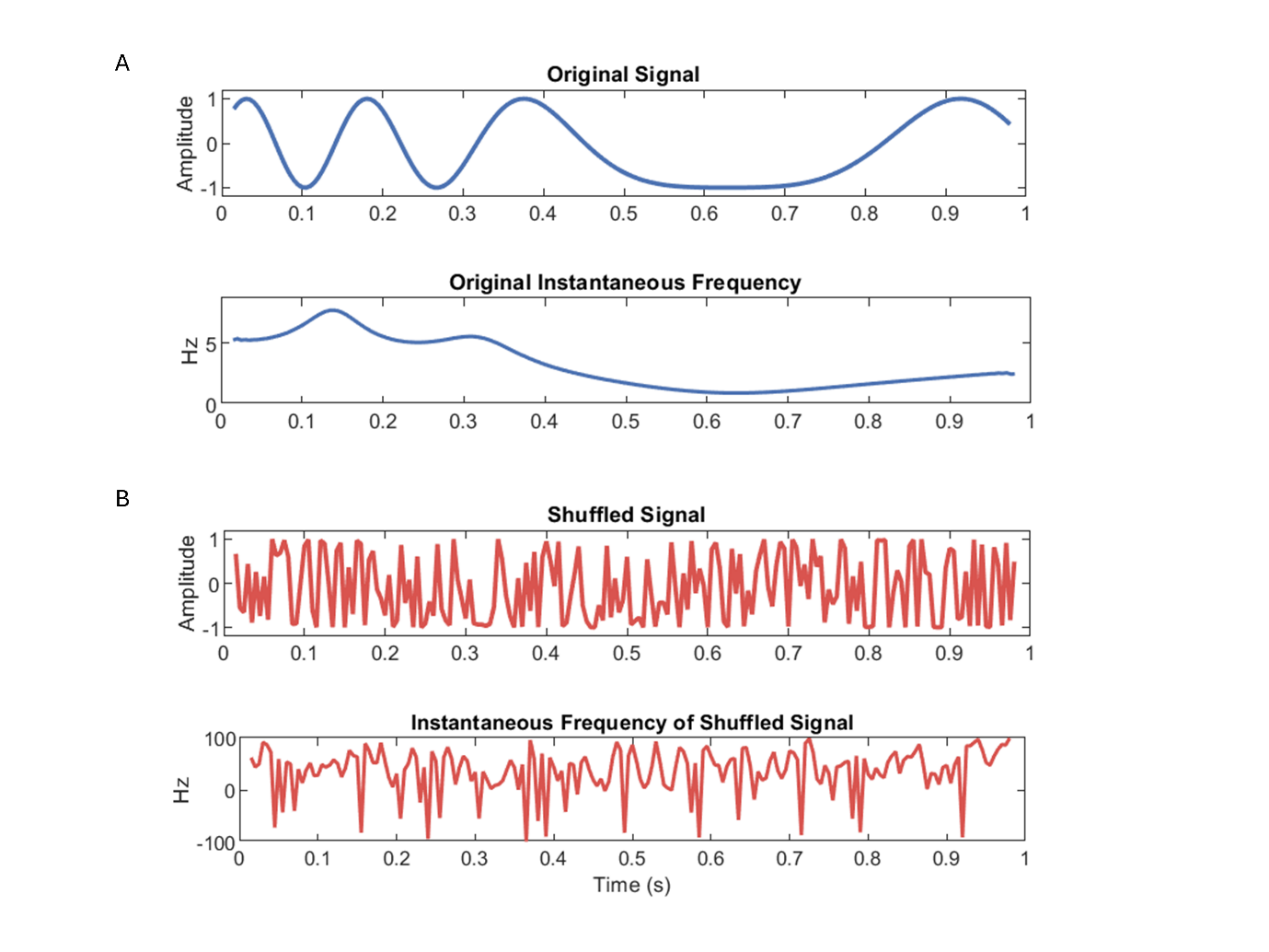


**Supplementary Figure S1**. Shuffling procedures applied to raw resting-state fMRI data. (A) Before shuffling, the signal exhibits a clear phase-cycle structure (rise, peak, fall, and trough) with smoothly varying instantaneous frequencies. (B) After randomizing raw BOLD time points, both phase cycle structure and peak frequency (instantaneous frequency) are disrupted. The original phase progression (rise → peak → fall → trough) is no longer visible, resulting in a random-like signal with altered frequency characteristics.

**Results**

*Analysis of Median Frequency and Frequency Power*

For median frequency (MF), independent-samples t-test showed no group difference (*t*(60) = 1.38, *p* = .17, Cohen’s d = 0.35), and paired-t test showed no time difference (*t*(30) = -0.70, *p* = .49, Cohen’s d = -0.13). For frequency power (FP), Mann-Whitney U test showed no group difference (*U*(60) = 480.00, *p* = 1.00, rank-biserial correlation = 0.001), and paired t-test indicated no time difference (*t*(30) = -0.35, *p* = .73, Cohen’s d =-0.06) (see Figure S2).


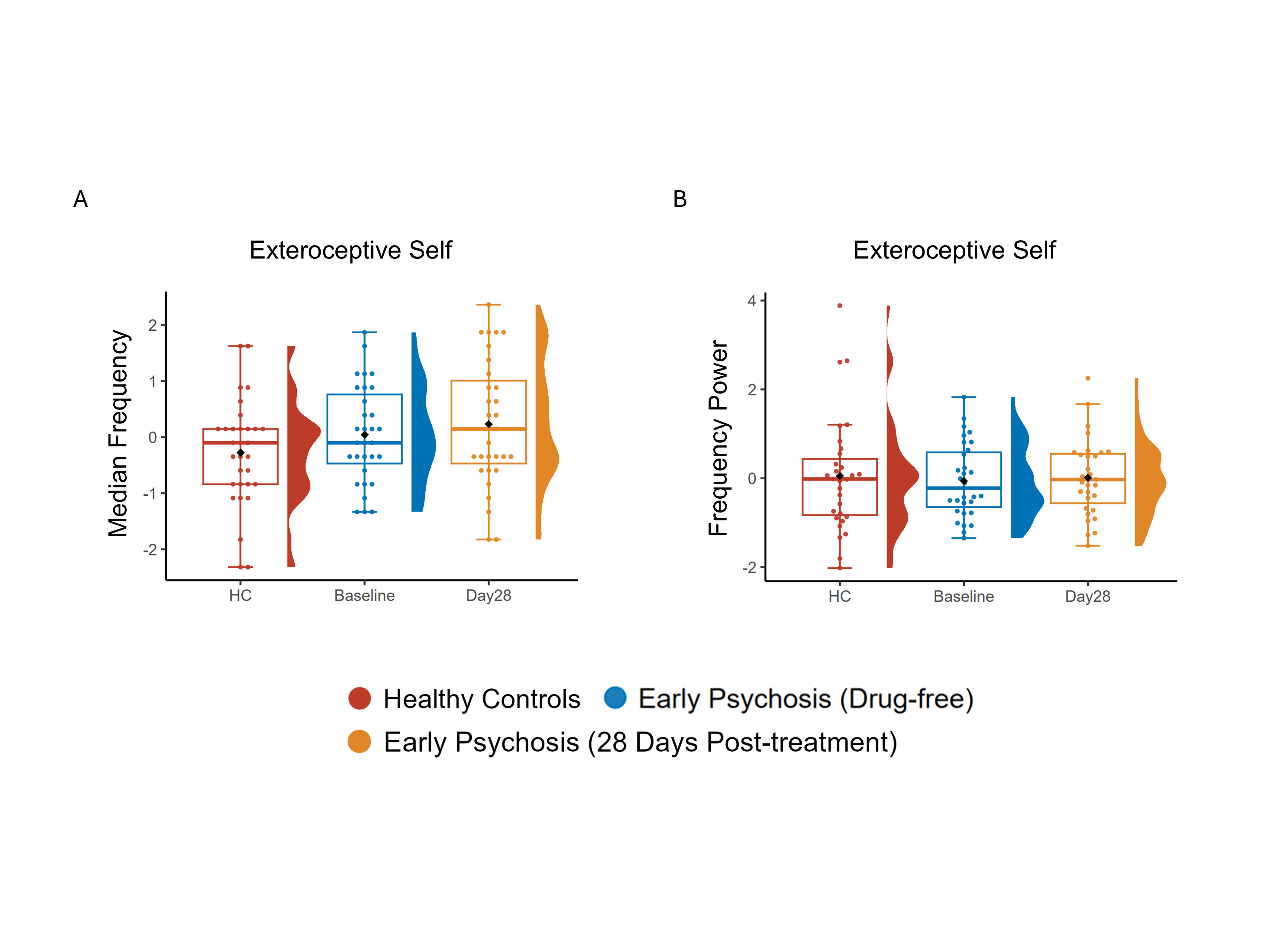


**Supplementary Figure S2**. Group differences in median frequency and frequency power. (A) Median frequency: No significant group differences were found between EPdrug-free and HC, nor between EPdrug-free and EPdrug-treatment groups across the three layers of the self. (B) Frequency Power: No significant group differences were found between EPdrug-free and HC, nor between EPdrug-free and EPdrug-treatment groups within the exteroceptive self. Baseline, Early Psychosis (Drug-free); HC, Healthy Controls; Day 28, Early Psychosis (28 Days Post-treatment)

*Shuffling of peak frequency*


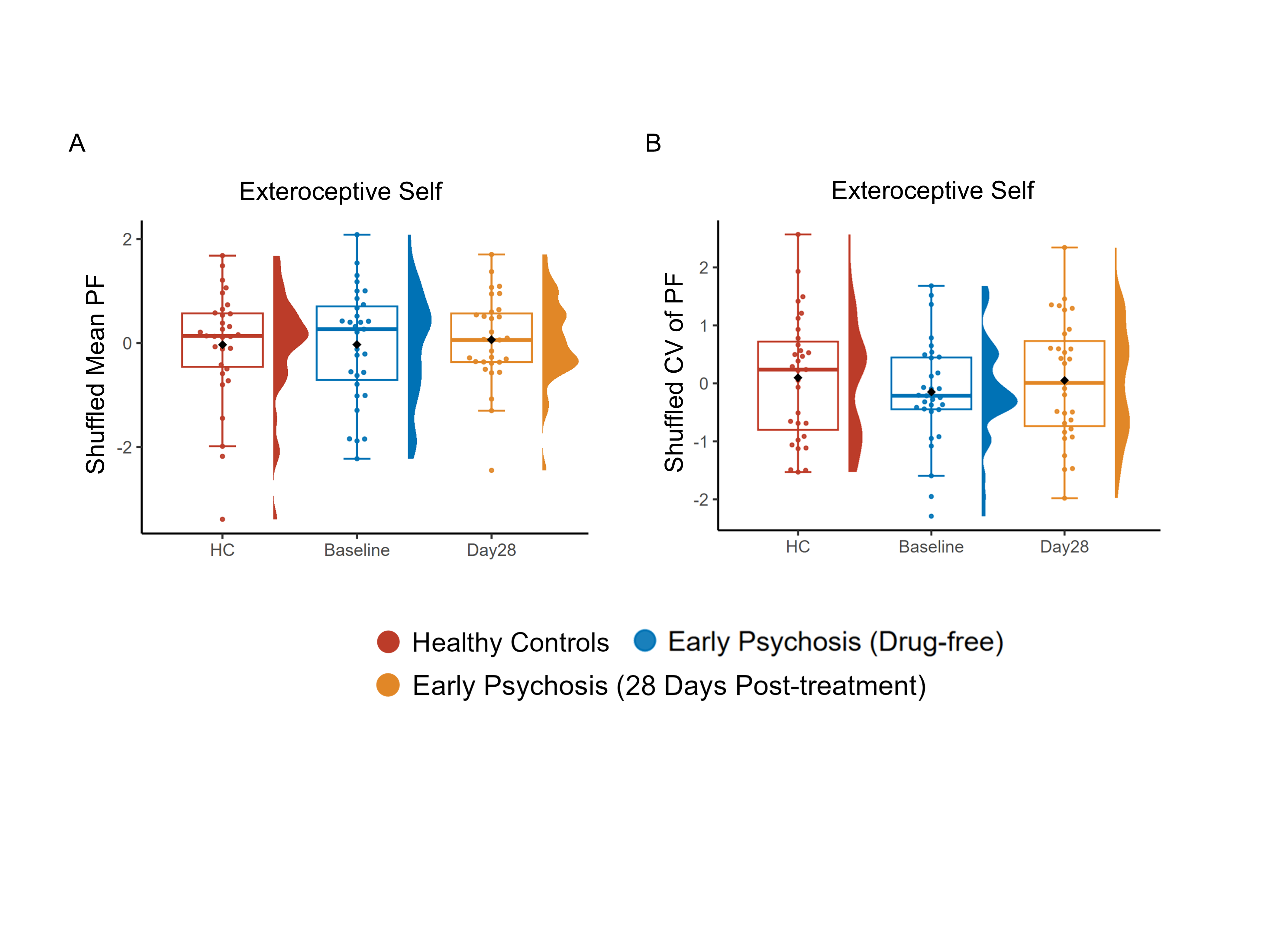


**Supplementary Figure S3**. Group differences in shuffled raw BOLD time points. (A) No significant group differences in shuffled peak frequency were observed in the exteroceptive self. (B) No significant group differences in the shuffled CV of peak frequency. Baseline, Early Psychosis (Drug-free); HC, Healthy Controls; Day 28, Early Psychosis (28 Days Post-treatment); PF, peak frequency.

*Correlation Between Dynamic Measures – SampEn relates to PF in HC but not in EP*

Given the importance of the shuffling, we also conducted the same correlations for the shuffled data. After the shuffling, EPdrug-free showed no correlation with PF (*r* = -0.01, *FDR*-corrected *p =* .96) or FP (*r* = 0.24, *FDR*-corrected *p =* .37). EPdrug-treatment showed no correlation with PF (*r* = -0.05, *FDR*-corrected *p =* .96) or FP (*r* = 0.01, *FDR*-corrected *p =* .96). HC also showed no significant correlation with PF (*ρ* = 0.06, *FDR*-corrected *p =* .76) or FP (*ρ* = -0.23, *FDR*-corrected *p =* .41)


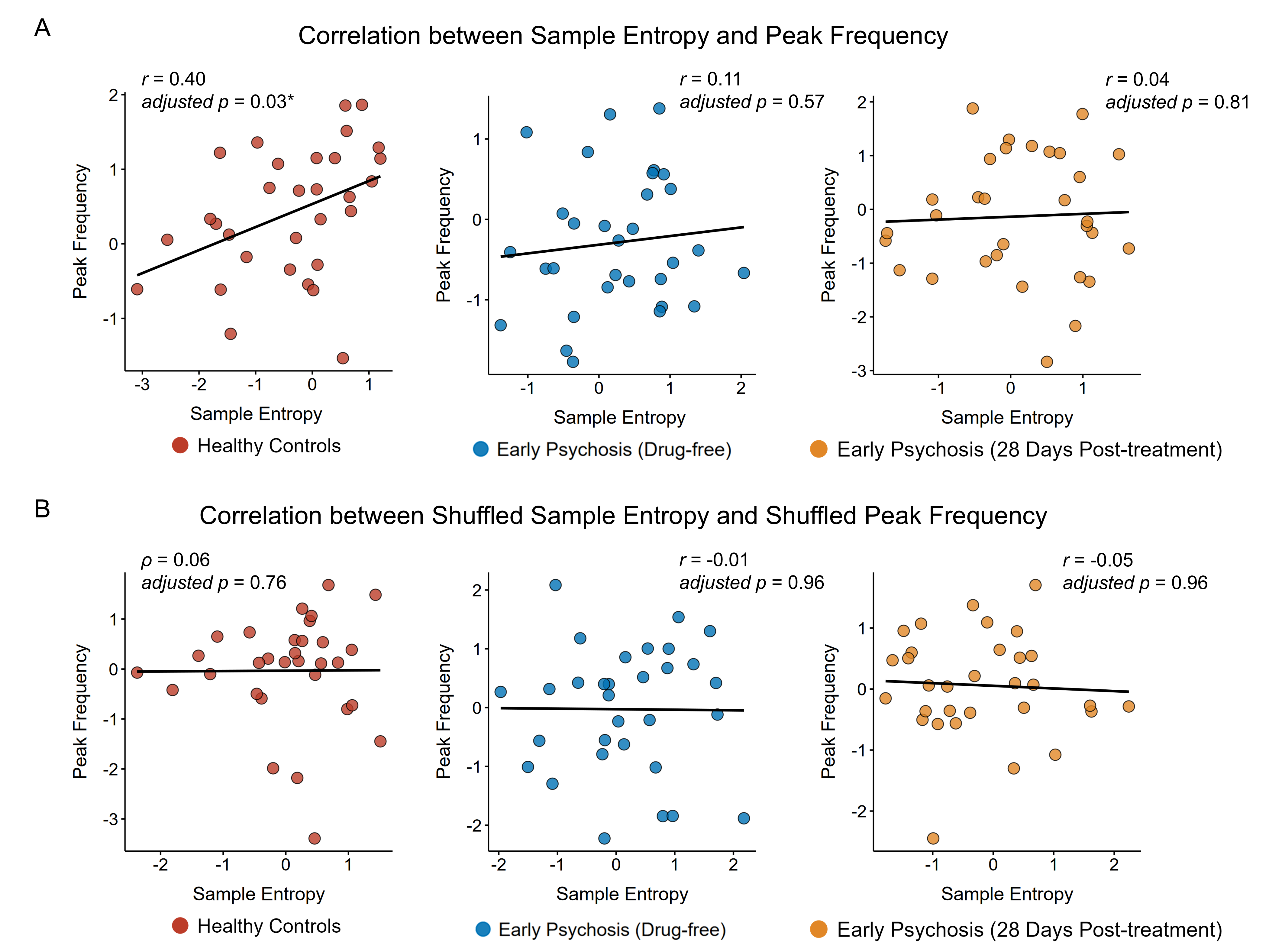


**Supplementary Figure S4**. Correlation between dynamic measures. (A) In HC, SampEn and PF were positively correlated, whereas no significant correlations were observed in EPdrug-free or EPdrug-treatment. (B) After shuffling BOLD signal time points, no significant correlations were found in any group. All adjusted *p*-values were FDR-corrected. *indicates significance at adjusted *p* < .05. HC, Healthy Controls; PF = peak frequency; SampEn = sample entropy.

*Logistic Regression Analysis – SampEn and PF predict EP – HC differentiation*

**Supplementary Table S3**. Logistic regression predicting diagnostic status (EP vs. HC) from sample entropy and peak frequencya

| Variables | B | S.E. | Wald’s *χ*2 | df | *p* | Odds ratio  (95% C.I.) |
| --- | --- | --- | --- | --- | --- | --- |
| Sample entropy | 0.99 | 0.36 | 7.41 | 1 | 0.007** | 2.69 (1.32-5.49) |
| Peak frequency | -1.24 | 0.38 | 10.35 | 1 | 0.001** | 0.29 (0.14-0.62) |

a Logistic regression was used to predict the dichotomous dependent variable diagnosis of EP (0= HC, 1= EP). Sample size = 31 per group

Abbreviations: EP, early psychosis; HC, healthy controls; S.E., standard error of the mean; C.I., confidence interval. ** indicates significance at *p* < .01

*Multivariate Regression – SampEn Predict Symptom Severity*

**Supplementary Table S4**. Multivariate regression results of sample entropy and peak frequency predicting five PANSS Marder factors

| Variable | Delusion/Hallucination | | Negative symptomsa | | Disorganized thought | | UHE | | AD | |
| --- | --- | --- | --- | --- | --- | --- | --- | --- | --- | --- |
|  | *β* | *pb* | *β* | *pb* | *β* | *pb* | *β* | *pb* | *β* | *pb* |
| Sample entropy | 0.34 | .19 | 0.64 | .02 | 0.60 | .02 | 0.07 | .83 | 0.63 | .02 |
| Peak frequency | 0.39 | .14 | -0.11 | .82 | -0.09 | .83 | 0.43 | .12 | -0.01 | .97 |
| Adjusted R2 | 0.14 |  | 0.23 |  | 0.18 |  | 0.08 |  | 0.21 |  |
| *F* (2,28) | 3.53 |  | 5.42 |  | 4.40 |  | 2.27 |  | 5.10 |  |
| *Pa* | .05 |  | .03 |  | .04 |  | .12 |  | .03 |  |

a Permutation test used due to non-normality.

b All p-values were FDR-corrected using the Benjamini-Hochberg method.

Abbreviations: *β*, standardized coeffcients; UHE, uncontrolled hostility/excitement; AD, anxiety/depression.

References

1. McGorry PD, Yung AR, Phillips LJ. The “Close-in” or Ultra High-Risk Model: A Safe and Effective Strategy for Research and Clinical Intervention in Prepsychotic Mental Disorder. Schizophr Bull. 2003;29(4): 771–90. https://doi.org/[10.1093/oxfordjournals.schbul.a007046](https://doi.org/10.1093/oxfordjournals.schbul.a007046)
2. Miller TJ, McGlashan TH, Woods SW, Stein K, Driesen N, Corcoran CM, et al. Symptom Assessment in Schizophrenic Prodromal States. Psychiatr Q. 1999;70(4): 273–87. https://doi.org/[10.1023/A:1022034115078](https://doi.org/10.1023/A:1022034115078)
3. Chen WJ, Liu SK, Chang CJ, Lien YJ, Chang YH, Hwu HG. Sustained Attention Deficit and Schizotypal Personality Features in Nonpsychotic Relatives of Schizophrenic Patients. Am J Psychiatry. 1998;155(9):1214–20. https://doi.org/[10.1176/ajp.155.9.1214](https://doi.org/10.1176/ajp.155.9.1214)
4. Lançon C, Auquier P, Nayt G, Reine G. Stability of the five-factor structure of the Positive and Negative Syndrome Scale (PANSS). Schizophr Res. 2000;42(3): 231–9. https://doi.org/[10.1016/S0920-9964(99)00129-2](https://doi.org/10.1016/S0920-9964(99)00129-2)
5. Djimbouon F, Klar P, Northoff G. Shorter and inflexible intrinsic neural timescales of the self in schizophrenia. J Psychiatry Neurosci. 2025;50(1): E57–66. https://doi.org/[10.1503/jpn.240093](https://doi.org/10.1503/jpn.240093)
6. Keskin K, Eker MÇ, Gönül AS, Northoff G. Abnormal global signal topography of self modulates emotion dysregulation in major depressive disorder. Transl Psychiatry. 2023;13(1): 107. https://doi.org/[10.1038/s41398-023-02398-2](https://doi.org/10.1038/s41398-023-02398-2)
7. Qin P, Wang M, Northoff G. Linking bodily, environmental and mental states in the self—A three-level model based on a meta-analysis. Neurosci Biobehav Rev. 2020;115: 77–95. <https://doi.org/10.1016/j.neubiorev.2020.05.004>
8. Golesorkhi M, Gomez-Pilar J, Çatal Y, Tumati S, Yagoub MCE, Stamatakis EA, et al. From temporal to spatial topography: hierarchy of neural dynamics in higher- and lower-order networks shapes their complexity. Cereb Cortex. 2022;32(24): 5637–53. https://doi.org/[10.1093/cercor/bhac042](https://doi.org/10.1093/cercor/bhac042)
9. Chiang S, Vankov ER, Yeh HJ, Guindani M, Vannucci M, Haneef Z, et al. Temporal and spectral characteristics of dynamic functional connectivity between resting-state networks reveal information beyond static connectivity. PLoS ONE. 2018;13(1): e0190220. https://doi.org/[10.1371/journal.pone.0190220](https://doi.org/10.1371/journal.pone.0190220)
10. Çatal Y, Gomez-Pilar J, Northoff G. Intrinsic dynamics and topography of sensory input systems. Cereb Cortex. 2022;32(20): 4592–604. https://doi.org/[10.1093/cercor/bhab504](https://doi.org/10.1093/cercor/bhab504)
11. Klar P, Çatal Y, Langner R, Huang Z, Northoff G. Scale‐free dynamics of core‐periphery topography. Hum Brain Mapp. 2023;44(5): 1997–2017. https://doi.org/[10.1002/hbm.26187](https://doi.org/10.1002/hbm.26187)
12. Wolman A, Çatal Y, Klar P, Steffener J, Northoff G. Repertoire of timescales in uni – and transmodal regions mediate working memory capacity. NeuroImage. 2024;291: 120602. https://doi.org/[10.1016/j.neuroimage.2024.120602](https://doi.org/10.1016/j.neuroimage.2024.120602)
13. Cohen MX. Fluctuations in Oscillation Frequency Control Spike Timing and Coordinate Neural Networks. J Neurosci. 2014;34(27): 8988–98. https://doi.org/[10.1523/JNEUROSCI.0261-14.2014](https://doi.org/10.1523/JNEUROSCI.0261-14.2014)
14. Ao Y, Catal Y, Lechner S, Hua J, Northoff G. Intrinsic neural timescales relate to the dynamics of infraslow neural waves. NeuroImage. 2024;285: 120482. https://doi.org/[10.1016/j.neuroimage.2023.120482](https://doi.org/10.1016/j.neuroimage.2023.120482)
15. Hua J, Wolff A, Zhang J, Yao L, Zang Y, Luo J, et al. Alpha and theta peak frequency track on- and off-thoughts. Commun Biol. 2022;5(1): 209. <https://doi.org/10.1038/s42003-022-03146-w>
